# Supplementary material for: Enhanced Antitumor Response to Immune Checkpoint Blockade Exerted by Cisplatin-Induced Mutagenesis in a Murine Melanoma Model
Source: Front Oncol. 2021 Jul 6;11:701968. doi: 10.3389/fonc.2021.701968 (PMC8290318; doi:10.3389/fonc.2021.701968)
Supplement: Supplementary Table 2 — Cisplatin mutations identified by the GATK pipeline and Mutect2. Mutations were identified and filtered as described in the methods. All mutations, including those in the exon flanking regions that passed the Mutect2 filter are included. Chromosomes and base numbering are based on the mouse mm10 reference genome. [file Table_2.xlsx]

## Sheet: mutations
Chromosome	Base position	Reference	Alteration	Filter
chr10	4558765	G	A	PASS
chr10	10403276	A	C	PASS
chr10	18217947	C	G	PASS
chr10	24876938	AG	GT	PASS
chr10	52311402	G	T	PASS
chr10	57291666	T	C	PASS
chr10	59428306	C	A	PASS
chr10	60049455	T	C	PASS
chr10	60534491	GA	G	PASS
chr10	62269769	C	T	PASS
chr10	76451659	T	G	PASS
chr10	90680657	A	T	PASS
chr10	94006857	G	A	PASS
chr10	99759593	C	T	PASS
chr10	100488915	A	T	PASS
chr10	103173199	A	G	PASS
chr10	107049113	A	C	PASS
chr10	112062096	CA	C	PASS
chr10	123147347	T	C	PASS
chr10	127519804	C	CCGGGGGGGGGGG	PASS
chr10	128615129	GG	TT	PASS
chr10	130360438	T	C	PASS
chr10	130576243	C	T	PASS
chr11	7201592	A	G	PASS
chr11	9683415	T	C	PASS
chr11	16236845	AT	A	PASS
chr11	43202161	A	G	PASS
chr11	49878107	C	A	PASS
chr11	49970958	CC	AA	PASS
chr11	50775075	G	A	PASS
chr11	53186054	G	T	PASS
chr11	56027549	T	C	PASS
chr11	58205872	A	T	PASS
chr11	59737508	G	T	PASS
chr11	60210550	GC	G	PASS
chr11	62859695	C	G	PASS
chr11	67659639	T	G	PASS
chr11	67762607	G	T	PASS
chr11	69158301	C	T	PASS
chr11	69395408	C	T	PASS
chr11	69477031	G	A	PASS
chr11	72180775	G	C	PASS
chr11	72498760	CC	AG	PASS
chr11	73029604	GG	AC	PASS
chr11	73710459	A	T	PASS
chr11	75315887	A	T	PASS
chr11	78313094	CTT	C	PASS
chr11	80265631	A	G	PASS
chr11	82918140	T	C	PASS
chr11	86707658	A	T	PASS
chr11	88944205	C	G	PASS
chr11	93910387	G	A	PASS
chr11	100717677	A	G	PASS
chr11	101033853	A	G	PASS
chr11	104978800	G	C	PASS
chr11	105076774	A	T	PASS
chr11	115803731	C	T	PASS
chr11	115916714	GAA	G	PASS
chr11	116931857	C	T	PASS
chr11	116945721	T	A	PASS
chr11	117702378	G	C	PASS
chr11	117792899	C	T	PASS
chr11	120091140	A	C	PASS
chr12	11279285	G	C	PASS
chr12	13239726	C	A	PASS
chr12	19828434	TC	CA	PASS
chr12	57680488	A	C	PASS
chr12	64977259	G	T	PASS
chr12	66620349	G	A	PASS
chr12	70183523	T	G	PASS
chr12	70938110	G	T	PASS
chr12	76001217	G	C	PASS
chr12	78669744	G	C	PASS
chr12	89260442	C	T	PASS
chr12	104471194	G	A	PASS
chr12	108318000	T	G	PASS
chr12	108867396	T	A	PASS
chr12	112042810	AG	GT	PASS
chr12	112914781	G	A	PASS
chr12	115371704	G	T	PASS
chr12	115404359	A	T	PASS
chr13	3329158	G	T	PASS
chr13	8887877	A	G	PASS
chr13	11769757	A	T	PASS
chr13	12290904	T	A	PASS
chr13	13191561	C	A	PASS
chr13	19099756	A	G	PASS
chr13	19594299	TA	T	PASS
chr13	22385835	AT	A	PASS
chr13	23745557	A	G	PASS
chr13	23810592	T	A	PASS
chr13	33761861	T	C	PASS
chr13	34129074	C	A	PASS
chr13	37894011	C	T	PASS
chr13	41010966	T	G	PASS
chr13	57587592	T	C	PASS
chr13	62206643	A	T	PASS
chr13	62840230	C	A	PASS
chr13	73940143	A	C	PASS
chr13	75448761	G	A	PASS
chr13	77267399	G	C	PASS
chr13	93663422	C	T	PASS
chr13	94476778	GG	AC	PASS
chr13	100744568	T	G	PASS
chr13	100780015	G	T	PASS
chr14	7892797	C	T	PASS
chr14	8043144	A	G	PASS
chr14	20263707	T	A	PASS
chr14	20263712	T	C	PASS
chr14	20719664	G	A	PASS
chr14	22891220	C	G	PASS
chr14	26812770	T	G	PASS
chr14	31745211	A	T	PASS
chr14	32242513	G	T	PASS
chr14	32977026	T	C	PASS
chr14	33552389	C	A	PASS
chr14	41132505	TG	T	PASS
chr14	47245915	T	A	PASS
chr14	51764404	T	TA	PASS
chr14	51764410	T	C	PASS
chr14	52389624	A	C	PASS
chr14	54253787	G	A	PASS
chr14	54595257	C	A	PASS
chr14	54964123	T	TA	PASS
chr14	56181035	T	G	PASS
chr14	57629795	CT	AC	PASS
chr14	57703078	A	G	PASS
chr14	68524326	CT	AA	PASS
chr14	72491448	T	A	PASS
chr14	75727476	C	G	PASS
chr14	78577446	T	C	PASS
chr14	93560666	A	T	PASS
chr14	99186554	C	A	PASS
chr14	103242227	C	G	PASS
chr14	110970894	G	T	PASS
chr15	31020579	C	T	PASS
chr15	44570295	G	C	PASS
chr15	58097597	C	G	PASS
chr15	58190990	C	T	PASS
chr15	65015134	A	C	PASS
chr15	66554929	T	A	PASS
chr15	66717679	C	G	PASS
chr15	73799205	C	A	PASS
chr15	74714405	C	G	PASS
chr15	75924447	A	C	PASS
chr15	76614022	TGG	T	PASS
chr15	76636926	G	T	PASS
chr15	77963424	G	T	PASS
chr15	83350290	A	T	PASS
chr15	85908098	T	G	PASS
chr15	86704967	A	G	PASS
chr15	92352939	A	G	PASS
chr15	97557746	T	G	PASS
chr15	97557749	T	G	PASS
chr15	99252241	G	C	PASS
chr15	100401971	G	A	PASS
chr15	101553414	TC	T	PASS
chr15	101756902	G	A	PASS
chr16	8706794	G	C	PASS
chr16	10508385	T	G	PASS
chr16	13793039	A	T	PASS
chr16	17303751	C	T	PASS
chr16	20658210	A	T	PASS
chr16	31878699	A	G	PASS
chr16	36253136	A	C	PASS
chr16	38240486	G	T	PASS
chr16	56186239	A	T	PASS
chr16	56264827	G	T	PASS
chr16	57507911	T	C	PASS
chr16	93760516	C	G	PASS
chr16	96619286	G	C	PASS
chr17	3453580	G	T	PASS
chr17	7251425	GG	TT	PASS
chr17	12414365	A	T	PASS
chr17	12710574	C	G	PASS
chr17	20114029	G	T	PASS
chr17	22735416	A	G	PASS
chr17	23191222	C	A	PASS
chr17	23191225	G	A	PASS
chr17	23716423	G	A	PASS
chr17	23867648	G	T	PASS
chr17	24720000	G	A	PASS
chr17	24920605	T	C	PASS
chr17	25454895	C	CA	PASS
chr17	28410111	C	A	PASS
chr17	33529240	T	G	PASS
chr17	34378268	AG	TT	PASS
chr17	34985655	ATT	A	PASS
chr17	36189287	T	G	PASS
chr17	37564004	A	C	PASS
chr17	42815940	C	G	PASS
chr17	46967643	T	C	PASS
chr17	49458365	G	A	PASS
chr17	50055417	T	C	PASS
chr17	56706611	T	G	PASS
chr17	57226359	T	C	PASS
chr17	65476348	G	T	PASS
chr17	71222175	G	A	PASS
chr17	73535270	C	A	PASS
chr17	74338862	A	C	PASS
chr18	5773352	G	C	PASS
chr18	6760948	T	G	PASS
chr18	10794332	C	T	PASS
chr18	12074826	G	C	PASS
chr18	20282194	T	G	PASS
chr18	20338638	G	T	PASS
chr18	32203714	G	A	PASS
chr18	37954845	A	G	PASS
chr18	59075577	G	A	PASS
chr18	61234989	G	A	PASS
chr18	61737233	G	T	PASS
chr18	63147027	G	A	PASS
chr18	65462878	C	T	PASS
chr18	65956762	C	G	PASS
chr18	70593809	C	A	PASS
chr18	76930076	G	T	PASS
chr18	77768313	G	T	PASS
chr18	82513111	C	G	PASS
chr18	82513113	A	G	PASS
chr18	86243087	T	C	PASS
chr19	22697426	A	G	PASS
chr19	25193278	GC	G	PASS
chr19	25193280	T	G	PASS
chr19	27786929	A	G	PASS
chr19	39041895	C	A	PASS
chr19	44156783	C	A	PASS
chr19	44156786	A	C	PASS
chr19	44975349	G	A	PASS
chr19	45423396	TG	GT	PASS
chr19	53631898	T	A	PASS
chr19	56309960	T	C	PASS
chr1	12748280	C	T	PASS
chr1	14869882	T	C	PASS
chr1	20558403	A	T	PASS
chr1	23382850	G	A	PASS
chr1	24282595	GG	AT	PASS
chr1	26685960	A	T	PASS
chr1	26687985	C	G	PASS
chr1	36269339	C	A	PASS
chr1	39300733	G	T	PASS
chr1	44873507	A	G	PASS
chr1	45326502	C	T	PASS
chr1	46030170	C	G	PASS
chr1	58421082	C	A	PASS
chr1	64550989	A	G	PASS
chr1	65062829	GC	TG	PASS
chr1	66862703	G	A	PASS
chr1	68309853	A	G	PASS
chr1	82525835	A	T	PASS
chr1	85063140	T	A	PASS
chr1	85259283	C	T	PASS
chr1	88106526	A	G	PASS
chr1	88227544	A	T	PASS
chr1	88229804	A	G	PASS
chr1	88264562	C	T	PASS
chr1	93073212	C	A	PASS
chr1	105753229	G	C	PASS
chr1	106749303	C	A	PASS
chr1	118668455	A	G	PASS
chr1	125562493	C	A	PASS
chr1	133357031	G	A	PASS
chr1	133358023	TG	CT	PASS
chr1	136419697	A	G	PASS
chr1	141356619	G	T	PASS
chr1	148976320	T	C	PASS
chr1	150674647	T	C	PASS
chr1	151644707	C	G	PASS
chr1	153074806	G	T	PASS
chr1	153476312	T	C	PASS
chr1	157164044	T	A	PASS
chr1	172230960	A	T	PASS
chr1	172561677	T	G	PASS
chr1	173862404	A	C	PASS
chr1	173928650	T	G	PASS
chr1	174069486	G	T	PASS
chr1	176844850	G	A	PASS
chr2	11683390	A	T	PASS
chr2	12247849	CC	AG	PASS
chr2	23264358	C	T	PASS
chr2	25338054	G	C	PASS
chr2	31018285	G	C	PASS
chr2	32219272	A	T	PASS
chr2	32757880	C	T	PASS
chr2	38708903	C	G	PASS
chr2	40646942	A	T	PASS
chr2	44386080	C	A	PASS
chr2	52235702	G	T	PASS
chr2	76865250	G	A	PASS
chr2	77108739	G	A	PASS
chr2	84373253	C	A	PASS
chr2	84669183	T	A	PASS
chr2	84685395	T	G	PASS
chr2	86229027	T	A	PASS
chr2	86413217	G	C	PASS
chr2	87308909	C	G	PASS
chr2	87783219	A	G	PASS
chr2	88642583	A	C	PASS
chr2	90745550	C	T	PASS
chr2	94117372	A	T	PASS
chr2	110007295	C	G	PASS
chr2	119126929	AG	TT	PASS
chr2	119403027	C	A	PASS
chr2	120051211	T	A	PASS
chr2	125219926	G	T	PASS
chr2	125947228	G	C	PASS
chr2	129378318	T	G	PASS
chr2	130137131	A	T	PASS
chr2	130576715	C	T	PASS
chr2	150399844	A	G	PASS
chr2	153952280	C	T	PASS
chr2	154632196	G	C	PASS
chr2	160982625	TG	T	PASS
chr2	164392893	A	T	PASS
chr2	167208190	G	C	PASS
chr2	167986094	G	T	PASS
chr2	178328254	T	C	PASS
chr2	181897026	C	T	PASS
chr3	9695989	C	G	PASS
chr3	27127501	T	C	PASS
chr3	32918629	G	A	PASS
chr3	39174570	T	G	PASS
chr3	54735144	T	G	PASS
chr3	62432743	T	G	PASS
chr3	62471329	A	C	PASS
chr3	67430339	A	T	PASS
chr3	67451342	G	C	PASS
chr3	75105705	A	T	PASS
chr3	75111819	T	A	PASS
chr3	83940207	T	A	PASS
chr3	84190749	T	C	PASS
chr3	87779291	C	G	PASS
chr3	88926960	G	A	PASS
chr3	89782257	G	C	PASS
chr3	92967488	T	G	PASS
chr3	94310616	G	A	PASS
chr3	95321164	T	A	PASS
chr3	98711627	G	T	PASS
chr3	106404595	A	G	PASS
chr3	109158382	A	G	PASS
chr3	118759570	T	G	PASS
chr3	137403909	T	G	PASS
chr3	138228405	G	A	PASS
chr3	144970397	CT	AA	PASS
chr3	154941118	AG	GT	PASS
chr4	11485986	T	G	PASS
chr4	11540847	T	G	PASS
chr4	25868616	A	T	PASS
chr4	34985860	C	T	PASS
chr4	43182891	A	T	PASS
chr4	46131886	A	T	PASS
chr4	47119099	C	G	PASS
chr4	53731290	A	G	PASS
chr4	58956879	C	A	PASS
chr4	62583924	C	T	PASS
chr4	76095882	T	C	PASS
chr4	76128868	G	C	PASS
chr4	81306795	GC	G	PASS
chr4	81306798	A	T	PASS
chr4	86797908	A	G	PASS
chr4	87789578	A	G	PASS
chr4	96017722	C	A	PASS
chr4	97556711	A	T	PASS
chr4	106438901	G	A	PASS
chr4	107882766	A	G	PASS
chr4	108604507	C	A	PASS
chr4	108858913	G	T	PASS
chr4	116611480	A	C	PASS
chr4	119258799	T	A	PASS
chr4	120163273	G	C	PASS
chr4	123487946	CC	AA	PASS
chr4	126027308	T	A	PASS
chr4	133638244	G	C	PASS
chr4	135891252	G	A	PASS
chr4	140790069	T	G	PASS
chr4	141432987	CTG	C	PASS
chr4	145020612	C	G	PASS
chr4	145404227	T	A	PASS
chr4	145412172	T	C	PASS
chr4	145434348	C	T	PASS
chr4	145520956	CC	AT	PASS
chr4	145574393	G	A	PASS
chr4	147407656	C	G	PASS
chr4	150611663	G	GAA	PASS
chr4	152488417	T	A	PASS
chr4	156331686	G	A	PASS
chr5	3584621	G	A	PASS
chr5	3695918	C	T	PASS
chr5	6772241	T	C	PASS
chr5	21098348	A	T	PASS
chr5	21948484	C	A	PASS
chr5	25281984	C	G	PASS
chr5	25710359	G	T	PASS
chr5	31109988	G	T	PASS
chr5	31640893	C	T	PASS
chr5	34883600	A	C	PASS
chr5	38135755	C	G	PASS
chr5	44473102	GA	G	PASS
chr5	49901990	A	C	PASS
chr5	67346295	AG	TT	PASS
chr5	67354881	A	G	PASS
chr5	68355983	T	G	PASS
chr5	72521815	T	C	PASS
chr5	73022196	C	T	PASS
chr5	86153046	G	A	PASS
chr5	86822430	A	C	PASS
chr5	86960936	C	A	PASS
chr5	89028370	G	T	PASS
chr5	93638901	CC	TG	PASS
chr5	104606826	CT	AA	PASS
chr5	108145850	C	T	PASS
chr5	109017228	G	T	PASS
chr5	109191611	G	T	PASS
chr5	110106924	G	C	PASS
chr5	110836763	T	C	PASS
chr5	112716806	A	C	PASS
chr5	113078594	C	T	PASS
chr5	113993549	A	C	PASS
chr5	113994047	G	T	PASS
chr5	118734368	G	C	PASS
chr5	122401744	A	T	PASS
chr5	122987319	C	A	PASS
chr5	125428402	C	A	PASS
chr5	130299678	G	T	PASS
chr5	135422148	G	C	PASS
chr5	136092820	A	C	PASS
chr5	139701357	A	G	PASS
chr5	139770638	C	CA	PASS
chr5	146157472	G	T	PASS
chr5	147677762	G	A	PASS
chr5	150603858	C	A	PASS
chr6	3494560	A	G	PASS
chr6	8175235	C	A	PASS
chr6	13166192	A	G	PASS
chr6	15405426	A	G	PASS
chr6	21217456	T	C	PASS
chr6	23344270	G	T	PASS
chr6	34311365	C	A	PASS
chr6	37097449	C	A	PASS
chr6	37567034	A	G	PASS
chr6	48476865	C	A	PASS
chr6	52225286	G	C	PASS
chr6	54220784	T	G	PASS
chr6	54220798	G	A	PASS
chr6	56345089	C	A	PASS
chr6	61956560	C	T	PASS
chr6	68541741	A	G	PASS
chr6	73073448	T	G	PASS
chr6	79048146	T	G	PASS
chr6	83198271	C	A	PASS
chr6	89383492	T	C	PASS
chr6	95322594	A	C	PASS
chr6	112359716	T	C	PASS
chr6	117935832	G	T	PASS
chr6	121017270	C	A	PASS
chr6	121945902	T	A	PASS
chr6	123780590	G	T	PASS
chr6	125570242	C	A	PASS
chr6	131312563	T	A	PASS
chr6	142112733	T	C	PASS
chr6	142652134	T	C	PASS
chr6	148411017	G	A	PASS
chr7	6067016	A	C	PASS
chr7	7118022	G	A	PASS
chr7	10078610	A	G	PASS
chr7	10745287	C	A	PASS
chr7	11231892	T	A	PASS
chr7	13212906	A	C	PASS
chr7	13847757	A	C	PASS
chr7	19100181	G	C	PASS
chr7	23354836	G	A	PASS
chr7	26377527	T	G	PASS
chr7	28510473	G	T	PASS
chr7	29715574	C	A	PASS
chr7	30623691	A	G	PASS
chr7	30957768	G	C	PASS
chr7	34345693	C	G	PASS
chr7	42045762	A	G	PASS
chr7	42933657	GA	G	PASS
chr7	43723593	T	C	PASS
chr7	43846939	T	G	PASS
chr7	44614489	C	A	PASS
chr7	45043733	A	T	PASS
chr7	45394508	A	C	PASS
chr7	57590167	A	T	PASS
chr7	61549922	C	T	PASS
chr7	66398583	G	T	PASS
chr7	67641233	CC	AT	PASS
chr7	75136683	C	A	PASS
chr7	75147773	C	G	PASS
chr7	81467886	T	G	PASS
chr7	85410324	T	G	PASS
chr7	85564775	C	A	PASS
chr7	92444320	C	G	PASS
chr7	99661204	T	C	PASS
chr7	102928340	G	A	PASS
chr7	105640527	CAA	C	PASS
chr7	107728500	C	G	PASS
chr7	110243043	A	G	PASS
chr7	116181300	AG	A	PASS
chr7	118722960	G	C	PASS
chr7	119464391	G	T	PASS
chr7	126128052	A	C	PASS
chr7	126969745	C	G	PASS
chr7	131093468	T	C	PASS
chr7	140081634	A	G	PASS
chr7	140144590	A	C	PASS
chr7	141411672	G	C	PASS
chr7	145303647	G	C	PASS
chr8	12312727	C	A	PASS
chr8	21417878	A	G	PASS
chr8	23132996	G	GT	PASS
chr8	25858321	A	G	PASS
chr8	26158751	C	G	PASS
chr8	26976763	G	A	PASS
chr8	43570603	G	A	PASS
chr8	54600763	C	G	PASS
chr8	55991312	C	G	PASS
chr8	62546776	A	C	PASS
chr8	62546780	A	C	PASS
chr8	70332414	A	C	PASS
chr8	72341133	CC	AA	PASS
chr8	84950910	C	G	PASS
chr8	88327243	T	G	PASS
chr8	88508927	G	A	PASS
chr8	104112548	T	A	PASS
chr8	105234888	A	C	PASS
chr8	105234904	T	A	PASS
chr8	105468370	C	G	PASS
chr8	105856413	G	A	PASS
chr8	111064241	G	A	PASS
chr8	122356891	G	C	PASS
chr9	14712259	C	T	PASS
chr9	18559862	T	A	PASS
chr9	19647771	C	T	PASS
chr9	20795488	G	C	PASS
chr9	20809415	T	C	PASS
chr9	21068110	G	C	PASS
chr9	21664517	G	C	PASS
chr9	22074290	C	T	PASS
chr9	38673520	C	A	PASS
chr9	39047540	CT	C	PASS
chr9	39470242	G	T	PASS
chr9	42057271	T	A	PASS
chr9	45174397	T	C	PASS
chr9	45767932	C	A	PASS
chr9	48324588	G	T	PASS
chr9	57414680	C	A	PASS
chr9	58016155	C	T	PASS
chr9	58218735	G	C	PASS
chr9	63422243	T	A	PASS
chr9	63837855	G	C	PASS
chr9	64705691	C	T	PASS
chr9	64738010	G	C	PASS
chr9	64931972	C	A	PASS
chr9	64949513	A	G	PASS
chr9	65573445	C	A	PASS
chr9	69488345	G	A	PASS
chr9	73734263	A	C	PASS
chr9	75661052	C	A	PASS
chr9	77001677	C	G	PASS
chr9	97178850	T	G	PASS
chr9	97363394	T	C	PASS
chr9	98032686	TG	CT	PASS
chr9	98589202	T	C	PASS
chr9	100945024	A	G	PASS
chr9	106570847	T	C	PASS
chr9	109051514	G	C	PASS
chr9	109051516	T	A	PASS
chr9	109075029	G	T	PASS
chr9	111333592	G	A	PASS
chr9	111390131	G	C	PASS
chr9	119635358	T	G	PASS
chr9	123839104	C	A	PASS
chrX	7375620	C	T	PASS
chrX	9273606	G	C	PASS
chrX	9309804	C	T	PASS
chrX	24067940	G	A	PASS
chrX	36432842	T	C	PASS
chrX	38376686	A	C	PASS
chrX	44863697	A	T	PASS
chrX	48503648	C	G	PASS
chrX	49012987	C	G	PASS
chrX	53776466	T	G	PASS
chrX	54081388	T	C	PASS
chrX	57388826	C	G	PASS
chrX	64047451	G	T	PASS
chrX	66691266	C	A	PASS
chrX	73550675	A	C	PASS
chrX	94537756	C	T	PASS
chrX	105884203	A	G	PASS
chrX	106221191	C	G	PASS
chrX	127062429	A	G	PASS
chrX	133962010	C	G	PASS
chrX	159415055	G	C	PASS
chrX	160036499	T	G	PASS
chrX	160036503	G	T	PASS
chrX	169257834	A	G	PASS
chrY	8186037	AA	GG	PASS
Mutations were identified and filtered as described in the methods.
All mutations, including those in the exon flanking regions, that passed the Mutect2 filter are included.
Chromosomes and base numbering are based on the mouse mm10 reference genome.
